# Supplementary material for: A dual functional MOF-based fluorescent sensor for intracellular phosphate and extracellular 4-nitrobenzaldehyde
Source: Royal Society of Chemistry journal article supplement (doi:10.1039/c8dt03964j), 2018-12-14
Supplement: c8dt03964j1.pdf [file c8dt03964j1.pdf]

Electronic Supplementary Material (ESI) for Dalton Transactions  
This journal is © The Royal Society of Chemistry 2018

### **Supplementary Information For:**

#### **A Dual Functional MOF-Based Fluorescent Sensor for Intracellular Phosphate and Extracellular 4-Nitrobenzaldehyde**

*Aniruddha Das,<sup>a</sup> Sourik Das<sup>a</sup> Vishal Trivedi,<sup>b</sup> and Shyam Biswas<sup>\*a</sup>*

<sup>a</sup> Department of Chemistry, Indian Institute of Technology Guwahati, Guwahati, 781039 Assam, India

<sup>b</sup> Malaria Research Group, Department of Biosciences and Bioengineering, Indian Institute of Technology Guwahati, 781039 Assam, India

\* To whom correspondence should be addressed. E-mail: sbiswas@iitg.ernet.in; Tel: 91-3612583309.

## Synthesis of H<sub>2</sub>BDC-N<sub>2</sub>H<sub>3</sub> ligand:

The synthesis of the H<sub>2</sub>BDC-N<sub>2</sub>H<sub>3</sub> ligand involves two steps (Scheme S1). It was synthesized by using 2-amino-1,4-benzenedicarboxylic acid (H<sub>2</sub>BDC-NH<sub>2</sub>) as the starting material.

**First step:** H<sub>2</sub>BDC-NH<sub>2</sub> ligand (1.81 g, 10 mmol) was dissolved in 20 mL of conc. HCl and stirred at 0 °C until complete dissolution is achieved. After that an aqueous solution of NaNO<sub>2</sub> (0.70 g, 10.14 mmol in 5 mL water) was added slowly to the mixture and kept under stirring conditions at 0 °C for 2 h.

**Second step:** After completion of 2 h, a mixture of SnCl<sub>2</sub>·2H<sub>2</sub>O (4.50 g, 19.94 mmol) in 15 mL conc. HCl was added slowly to the solution obtained in the first step. The resulting mixture was stirred for 3 h at room temperature. The precipitate was filtered and repeatedly washed with water until neutral pH is obtained. The pale yellow colored product was finally washed with ethanol (2 × 3 mL) and diethyl ether (2 × 3 mL), and dried in a conventional oven at 60 °C for 4 h. Yield: 1.18 g (6.0 mmol, 60%). <sup>1</sup>H-NMR (600 MHz, DMSO-d<sub>6</sub>): δ = 8.04 (s, 1H), 7.90 (s, 1H), 7.80 (d, 1H), 7.06 (d, 1H) ppm. <sup>13</sup>C NMR (150 MHz, DMSO-d<sub>6</sub>): δ = 168.36, 166.58, 147.26, 135.79, 131.91, 120.42, 117.07, 114.63 ppm. ESI-MS (m/z): 195.0331 for (M-H)<sup>-</sup> ion (M = mass of H<sub>2</sub>BDC-N<sub>2</sub>H<sub>3</sub> ligand). In Figures S1-S3 (Supporting Information), the NMR and mass spectra for the H<sub>2</sub>BDC-N<sub>2</sub>H<sub>3</sub> ligand are shown.

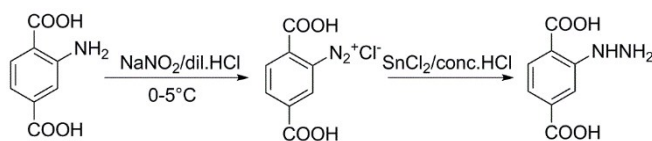

**Scheme S1.** Reaction scheme for the preparation of H<sub>2</sub>BDC-N<sub>2</sub>H<sub>3</sub> ligand.

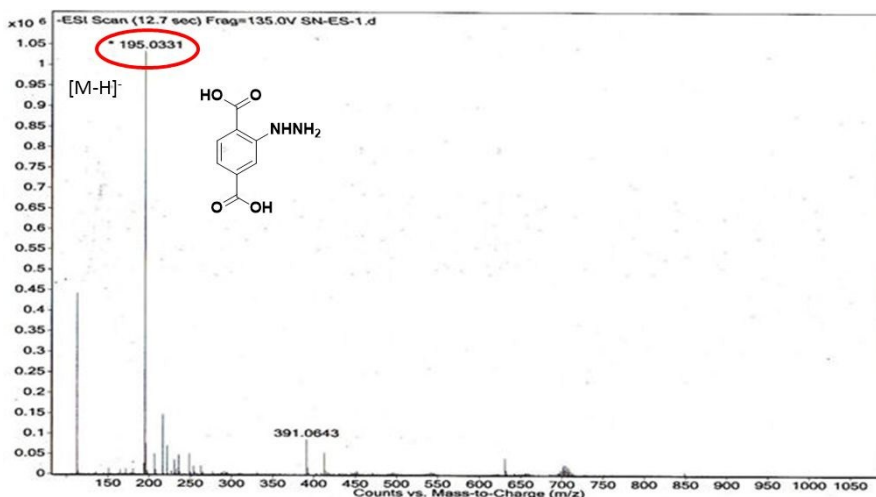

**Figure S1.** ESI-MS spectrum of the H<sub>2</sub>BDC-N<sub>2</sub>H<sub>3</sub> ligand in methanol. The spectrum shows m/z (negative ion mode) peak at 195.0331, which corresponds to (M-H)<sup>-</sup> ion (M = mass of H<sub>2</sub>BDC-N<sub>2</sub>H<sub>3</sub> ligand).

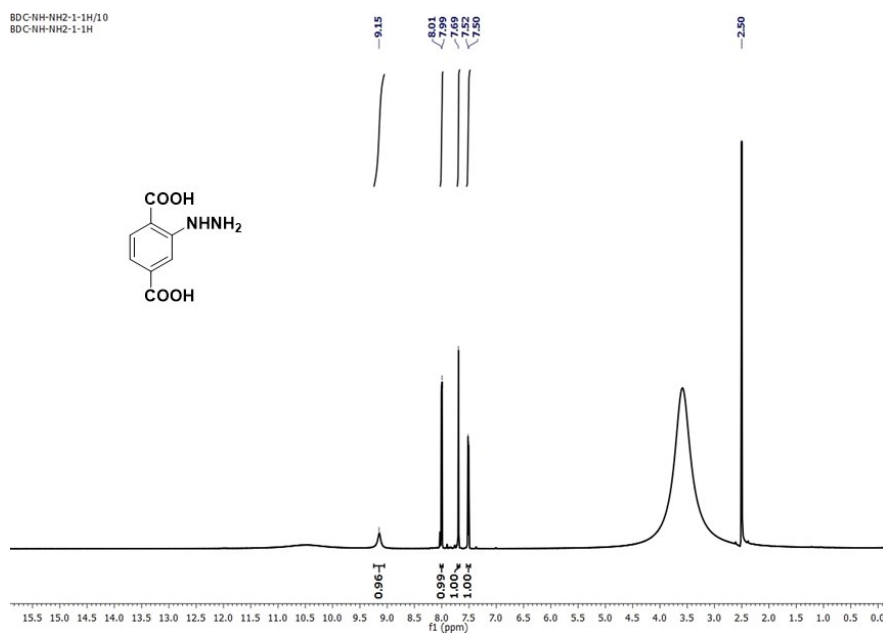

**Figure S2.** <sup>13</sup>C NMR spectrum of the H<sub>2</sub>BDC-N<sub>2</sub>H<sub>3</sub> ligand in DMSO-d<sub>6</sub>.

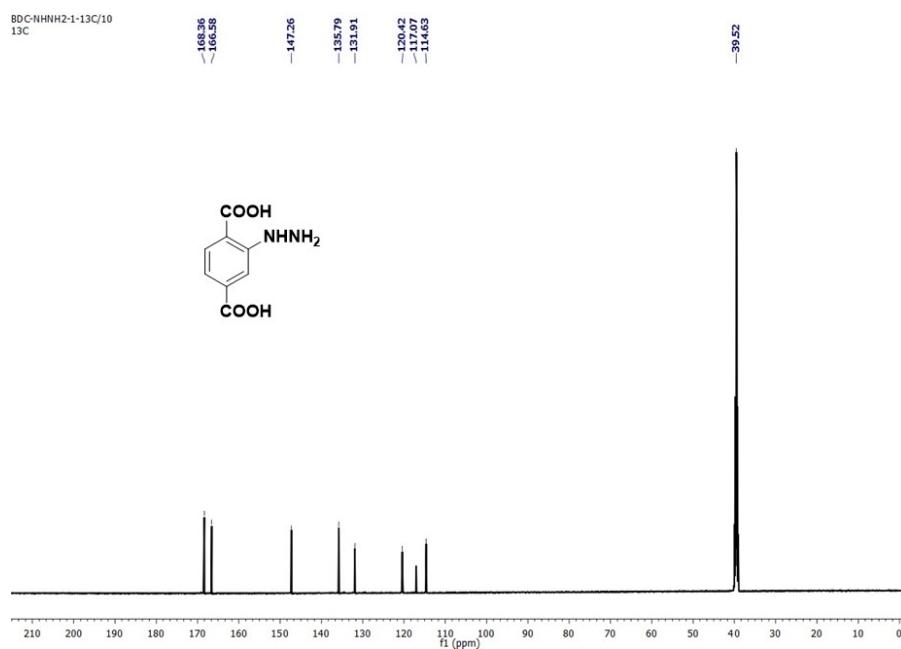

**Figure S3.**  $^{13}\text{C}$  NMR spectrum of the  $\text{H}_2\text{BDC-N}_2\text{H}_3$  ligand in  $\text{DMSO-d}_6$ .

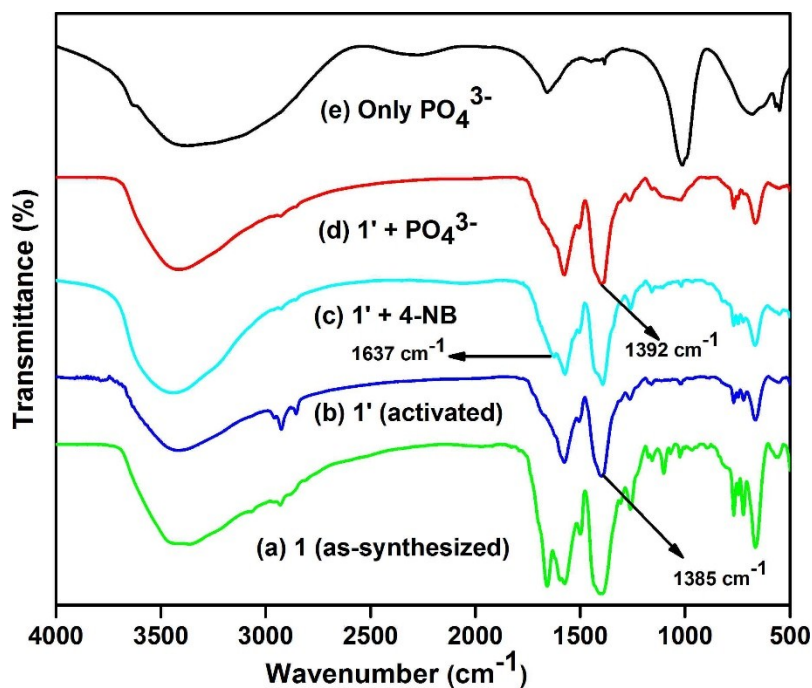

**Figure S4.** FT-IR spectra of (a) as-synthesized **1**, (b) activated **1'**, (c) **1'** after treatment with 4-NB, (d) **1'** after treatment with  $\text{Na}_3\text{PO}_4$  ( $\text{Zr/P} = 0.6$ ), and (e) only  $\text{Na}_3\text{PO}_4$ .

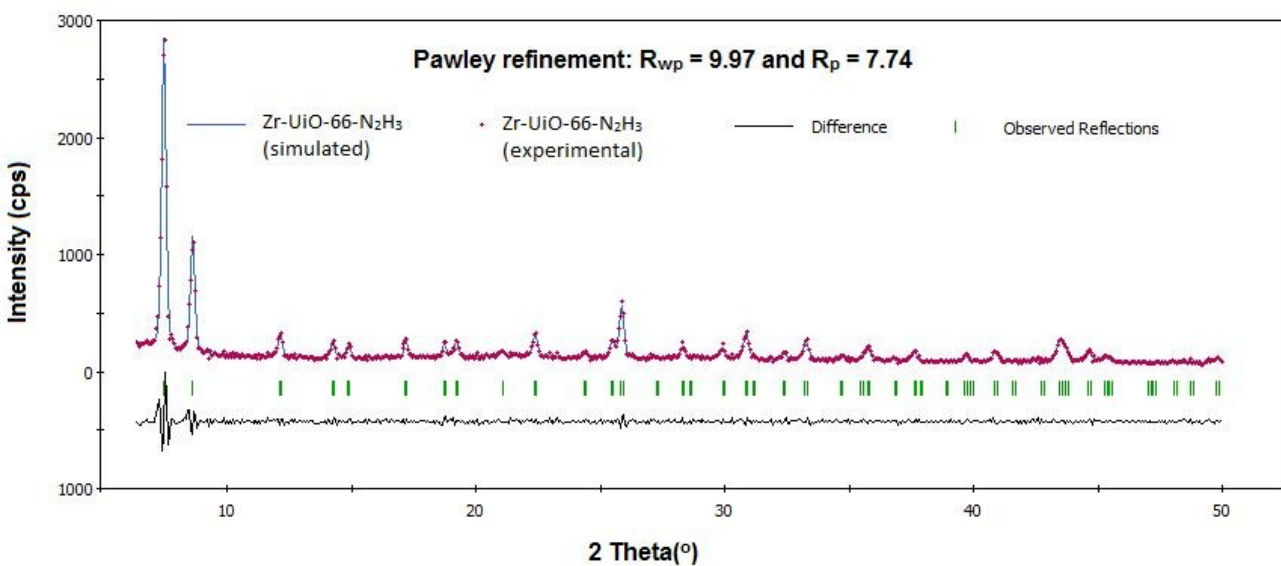

**Figure S5.** Pawley fit for the XRPD pattern of as-synthesized **1**. Blue lines and red dots denote calculated and observed patterns, respectively. The peak positions and difference plot are displayed at the bottom ( $R_{\text{wp}} = 9.97$ ,  $R_p = 7.74$ ).

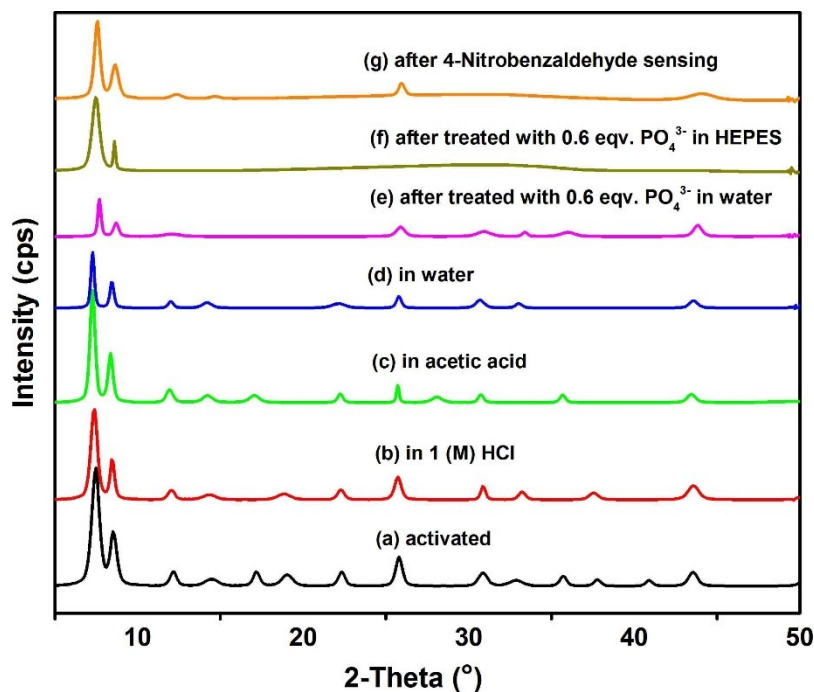

**Figure S6.** XRRD patterns of compound **1** in different forms: (a) activated, (b) **1'** after treatment with 1(M) HCl, (c) **1'** after treatment with acetic acid, (d) **1'** after treatment with water, (e) **1'** after phosphate sensing experiment in water, (f) **1'** after phosphate sensing experiment in HEPES (10 mM, pH = 7.4) and (g) **1'** after 4-NB sensing experiment.

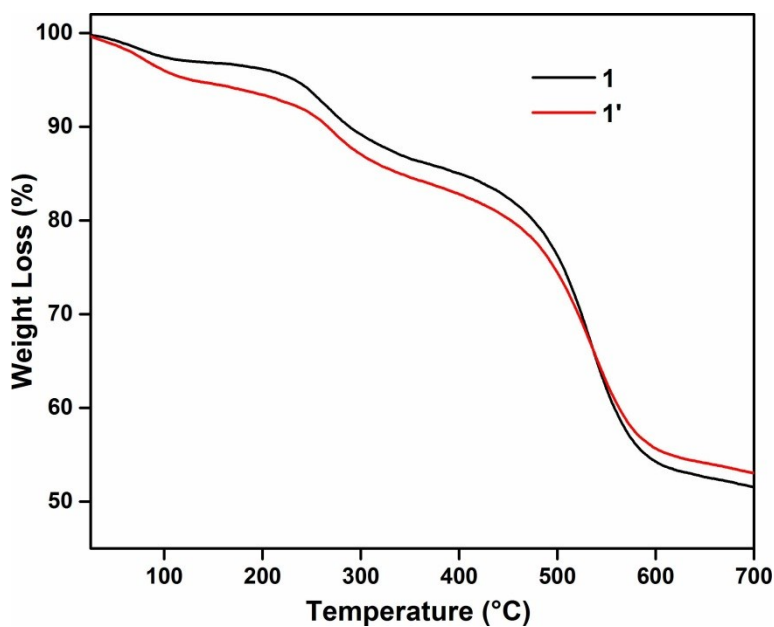

**Figure S7.** TG curves of as-synthesized **1** (black) and thermally activated **1'** (red) recorded in an air atmosphere in the temperature range of 25-700 °C with a heating rate of 10 °C min<sup>-1</sup>.

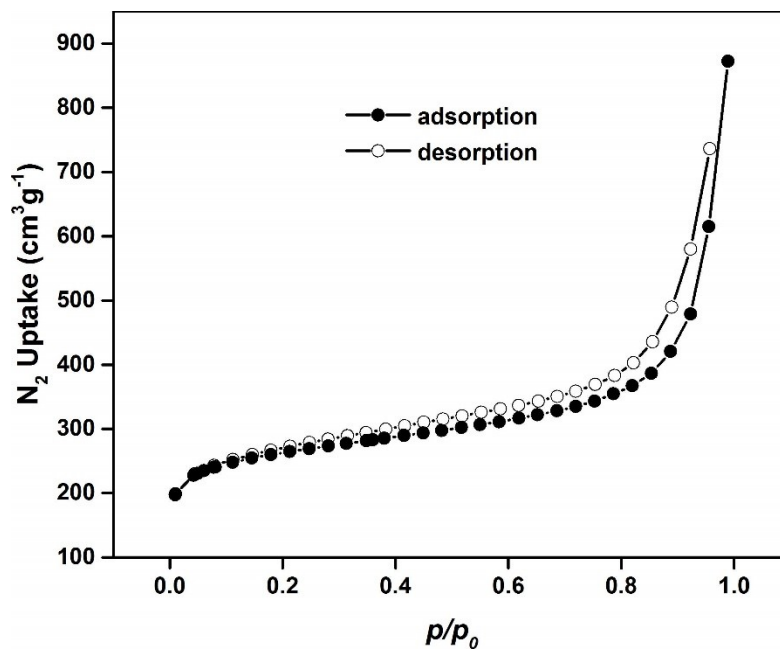

**Figure S8.** N<sub>2</sub> adsorption (black circles) and desorption (red circles) isotherms of **1'** measured at –196 °C.

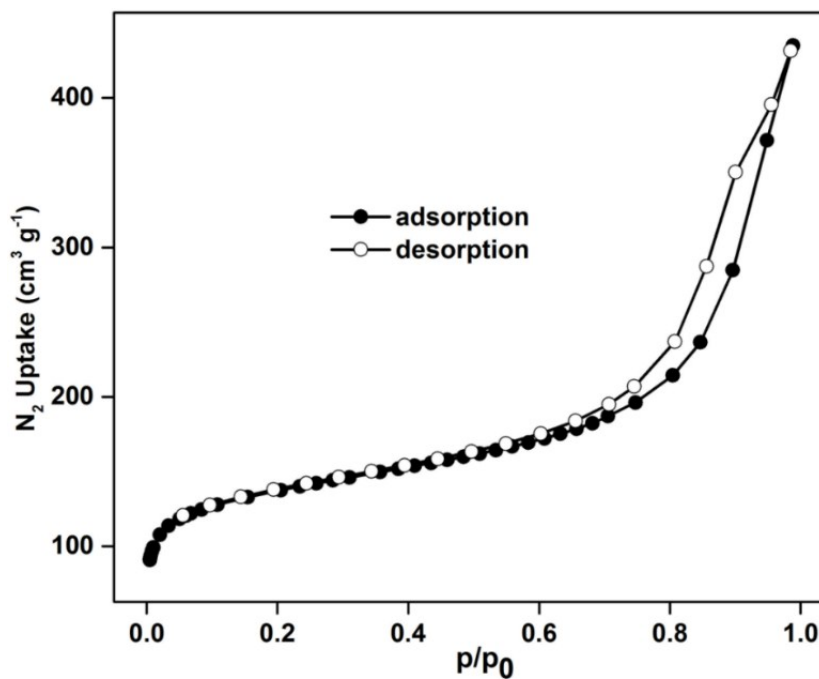

**Figure S9.** N<sub>2</sub> adsorption (solid circles) and desorption (empty circles) isotherms of **1'** recovered after the phosphate sensing experiment. The isotherms were measured at -196 °C.

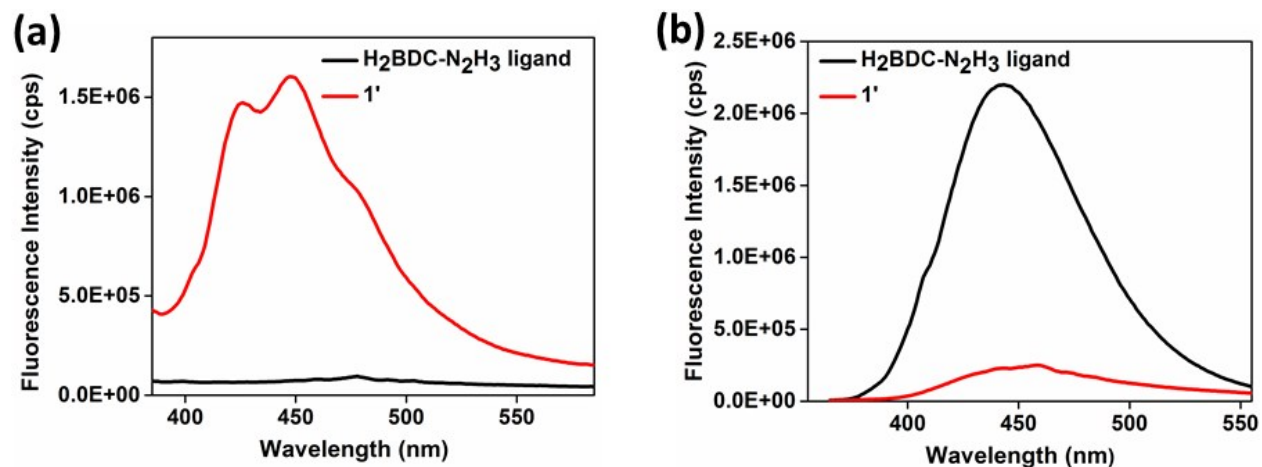

**Figure S10.** (a) Solid-state luminescence spectra of free H<sub>2</sub>BDC-N<sub>2</sub>H<sub>3</sub> ligand and 1'. (b) Luminescence spectra of free H<sub>2</sub>BDC-N<sub>2</sub>H<sub>3</sub> ligand and 1' in the aqueous medium.

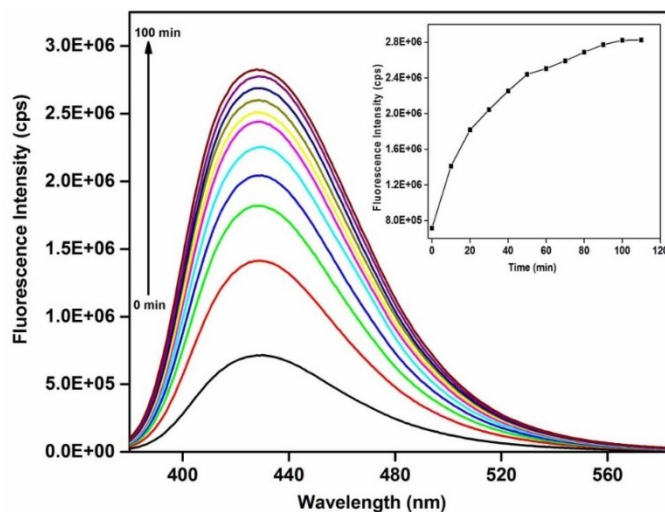

**Figure S11.** Enhancement of the fluorescence intensity of 1' (suspended in 10 mM HEPES buffer, pH = 7.4) with time upon the addition of 400  $\mu$ L of 2 mM Na<sub>3</sub>PO<sub>4</sub> solution (in 10 mM HEPES buffer, pH = 7.4).

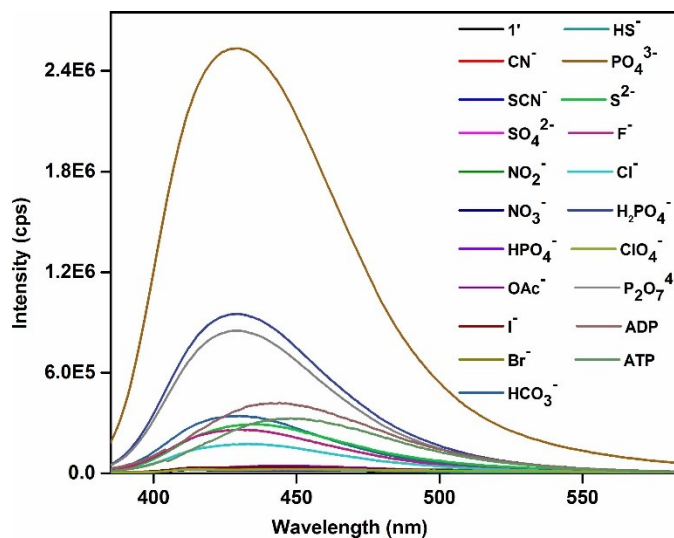

**Figure S12.** Enhancement of the fluorescence intensity of **1'** (suspended in water) with time upon the addition of 400  $\mu\text{L}$  of 2 mM  $\text{Na}_3\text{PO}_4$  solution (in water).

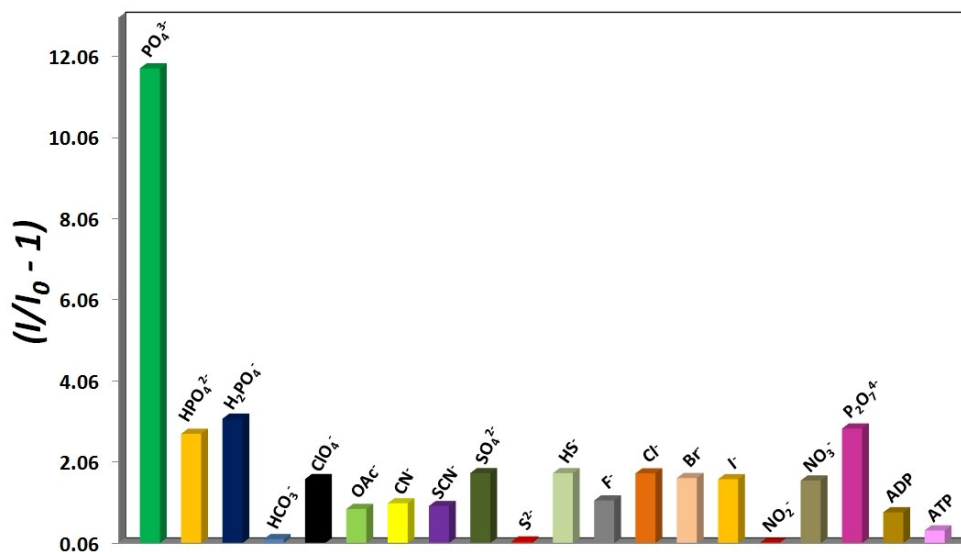

**Figure S13.** Change in the fluorescence intensity of the suspension of **1'** (in 10 mM HEPES buffer, pH = 7.4) upon the addition of the solutions of different anions. All the anions were added as HEPES buffer solutions.



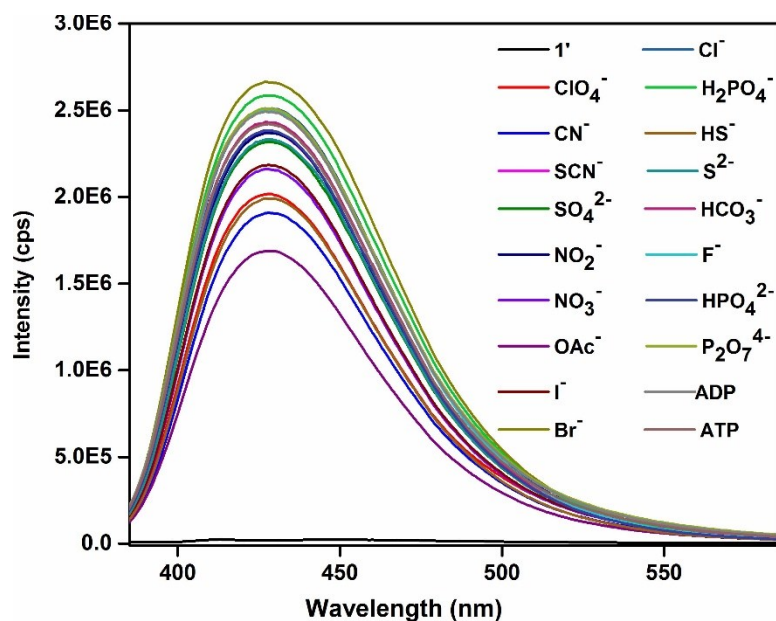

**Figure S14.** Enhancement of the fluorescence intensity of **1'** (suspended in water) with time upon the addition of 400  $\mu\text{L}$  of 2 mM  $\text{PO}_4^{3-}$  solution (in water).

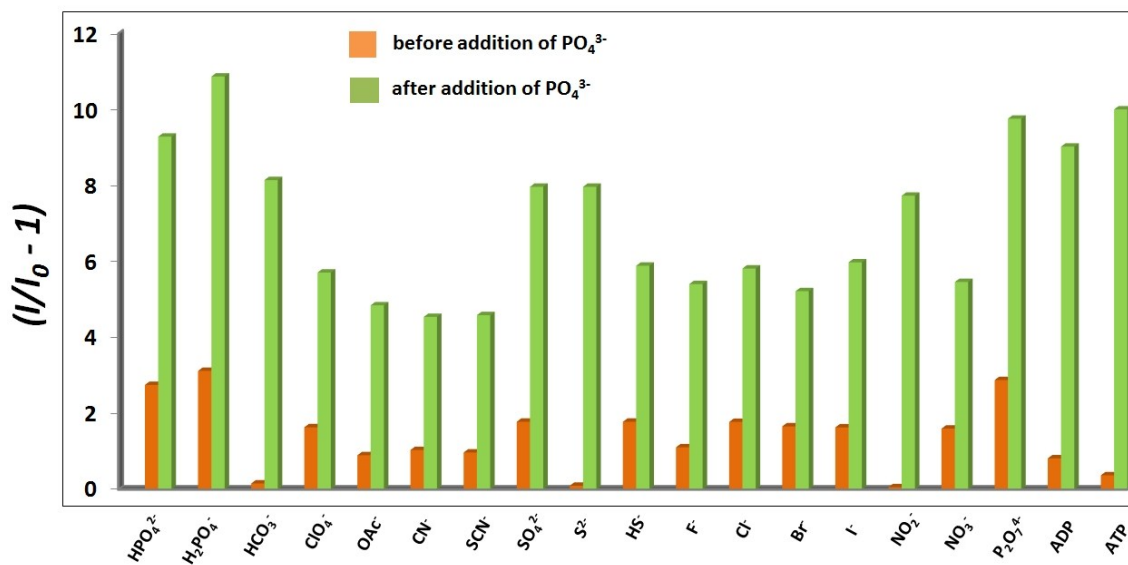

**Figure 15.** Change in the fluorescence intensity of the suspension of **1'** (in 10 mM HEPES buffer, pH = 7.4) upon the addition of  $\text{PO}_4^{3-}$  solution in the presence of other potentially competing anions. All the anions were added as HEPES buffer solutions.

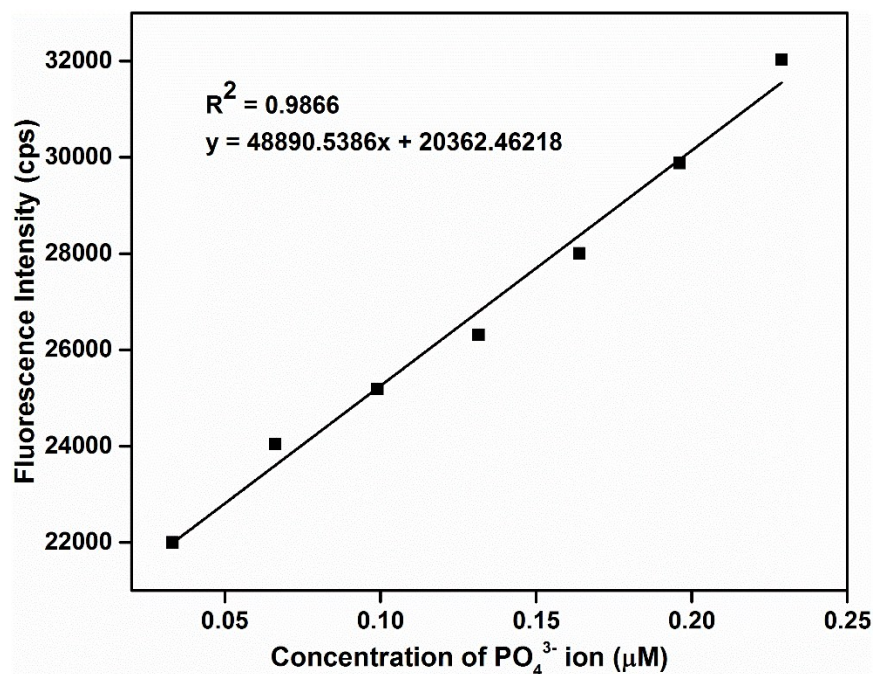

**Figure S16.** Change in the fluorescence intensity of **1'** as a function of concentration of PO<sub>4</sub><sup>3-</sup> ion in water.

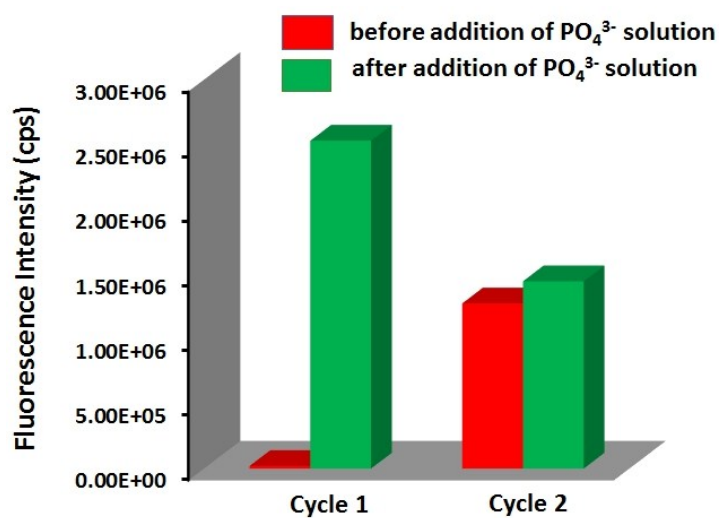

**Figure S17.** Recyclability test for the fluorescence *turn-on* response of the aqueous suspension of **1'** towards 2 mM PO<sub>4</sub><sup>3-</sup> solution.

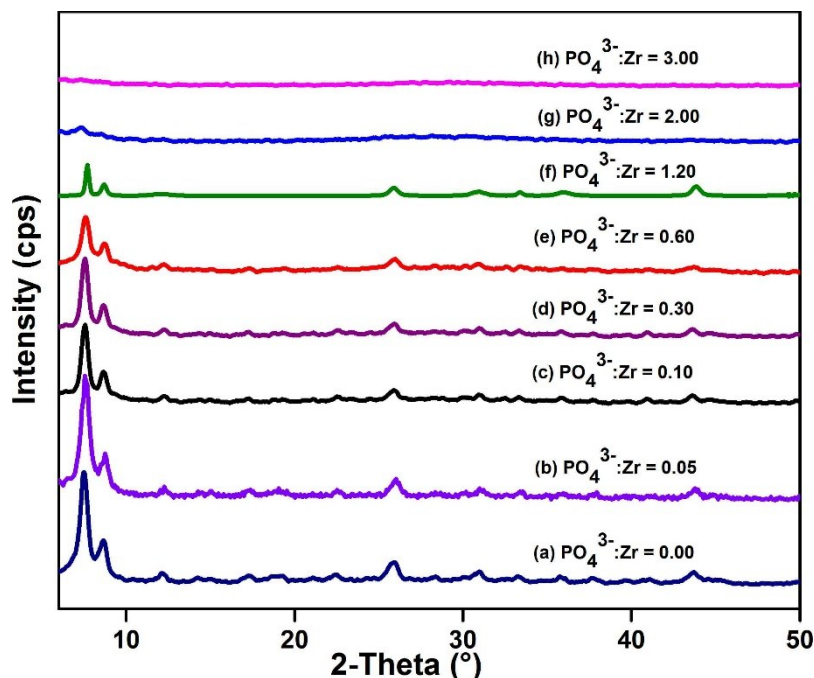

**Figure S18.** XRD patterns of compound **1'** after treatment with different molar ratio of phosphate with respect to zirconium: **1'** after treatment with (a) PO<sub>4</sub><sup>3-</sup>:Zr = 0.00, (b) PO<sub>4</sub><sup>3-</sup>:Zr = 0.05, (c) PO<sub>4</sub><sup>3-</sup>:Zr = 0.10, (d) PO<sub>4</sub><sup>3-</sup>:Zr = 0.30, (e) PO<sub>4</sub><sup>3-</sup>:Zr = 0.60, (f) PO<sub>4</sub><sup>3-</sup>:Zr = 1.20, (g) PO<sub>4</sub><sup>3-</sup>:Zr = 2.00 and (h) PO<sub>4</sub><sup>3-</sup>:Zr = 3.00.

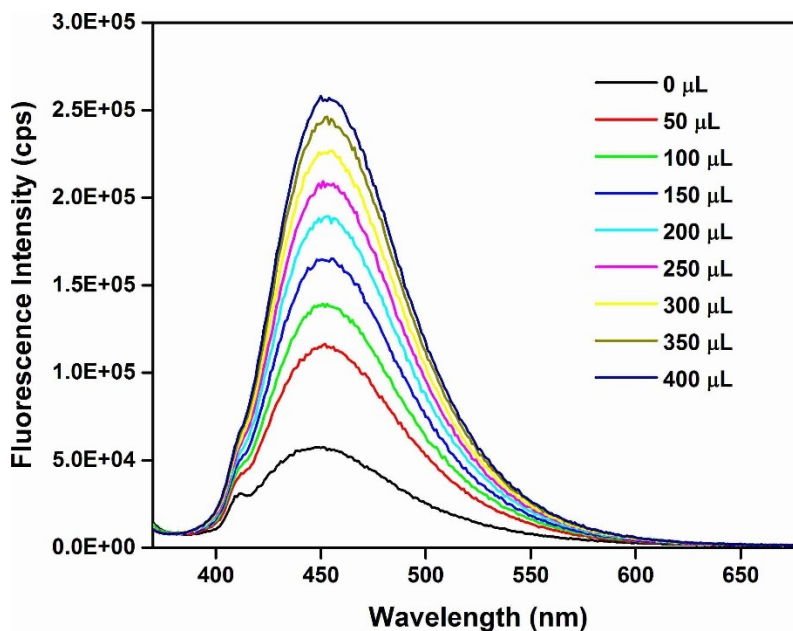

**Figure S19.** Enhancement of the fluorescence intensity of **1'** (suspended in 10 mM HEPES buffer at pH = 3.4) upon gradual addition of 400 μL of 2 mM aqueous solution of PO<sub>4</sub><sup>3-</sup> ion ( $\lambda_{\text{ex}} = 360$  nm,  $\lambda_{\text{em}} = 430$  nm).

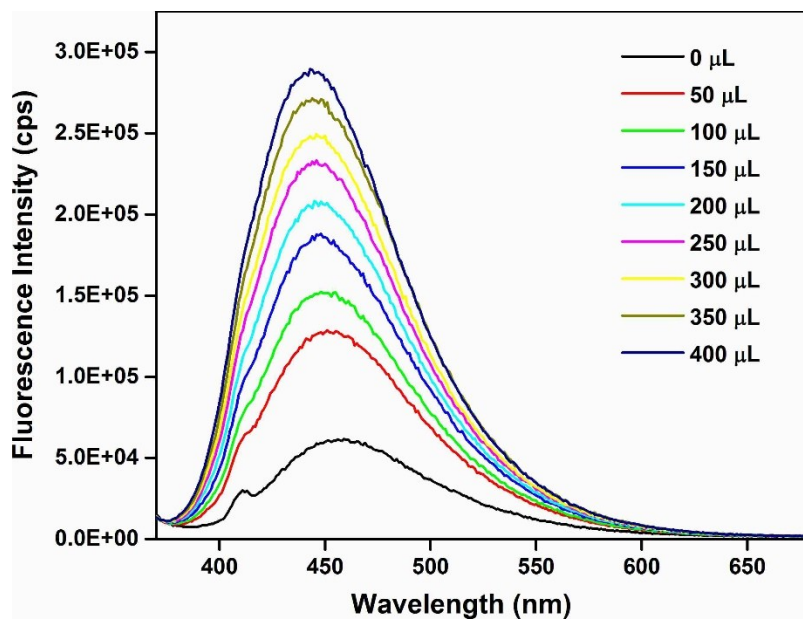

**Figure S20.** Enhancement of the fluorescence intensity of **1'** (suspended in 10 mM HEPES buffer at pH = 5.4) upon gradual addition of 400 μL of 2 mM aqueous solution of PO<sub>4</sub><sup>3-</sup> ion ( $\lambda_{\text{ex}} = 360$  nm,  $\lambda_{\text{em}} = 430$  nm).

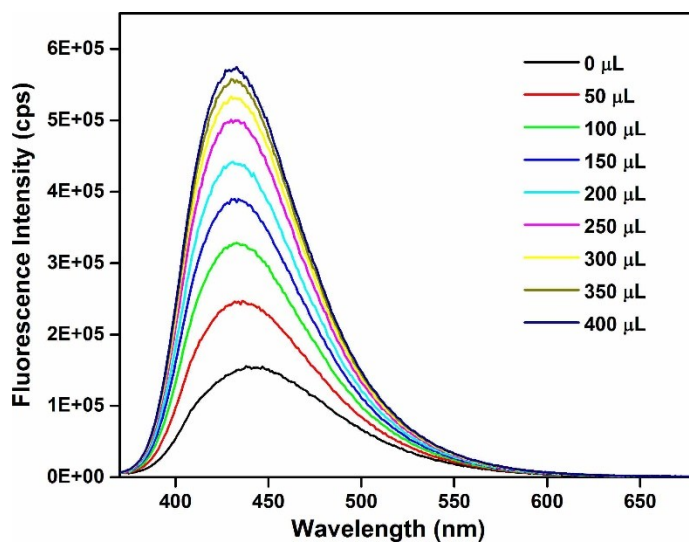

**Figure S21.** Enhancement of the fluorescence intensity of **1'** (suspended in 10 mM HEPES buffer at pH = 7.4) upon gradual addition of 400 μL of 2 mM aqueous solution of PO<sub>4</sub><sup>3-</sup> ion ( $\lambda_{\text{ex}} = 360$  nm,  $\lambda_{\text{em}} = 430$  nm).

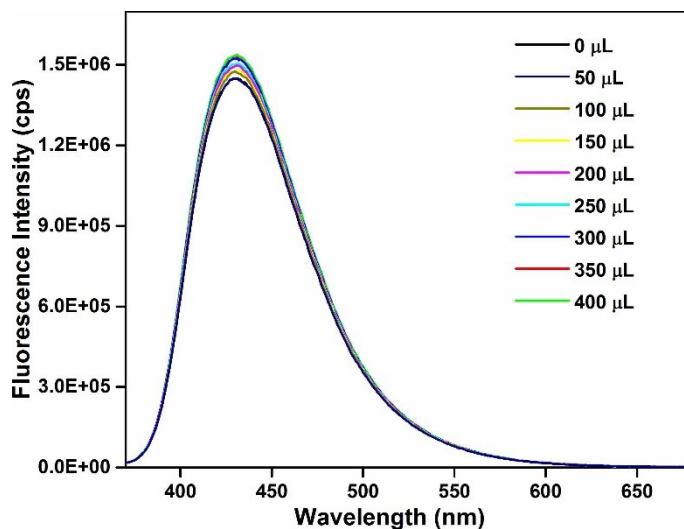

**Figure S22.** Enhancement of the fluorescence intensity of **1'** (suspended in 10 mM HEPES buffer at pH = 9.4) upon gradual addition of 400  $\mu\text{L}$  of 2 mM aqueous solution of  $\text{PO}_4^{3-}$  ion ( $\lambda_{\text{ex}} = 360$  nm,  $\lambda_{\text{em}} = 430$  nm).

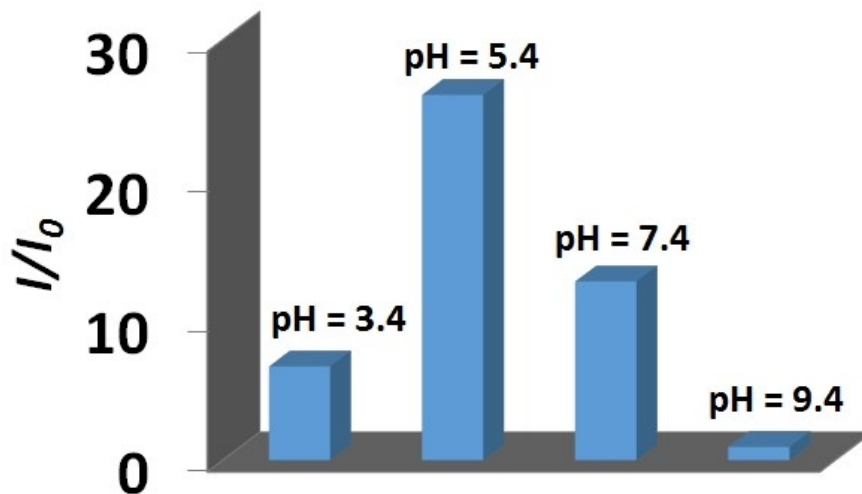

**Figure S23.** Change in the fluorescence intensity of **1'** (suspended in 10 mM HEPES buffer) at different pH values upon the addition of 400  $\mu\text{L}$  of 2 mM  $\text{Na}_3\text{PO}_4$  solution (in 10 mM HEPES buffer).

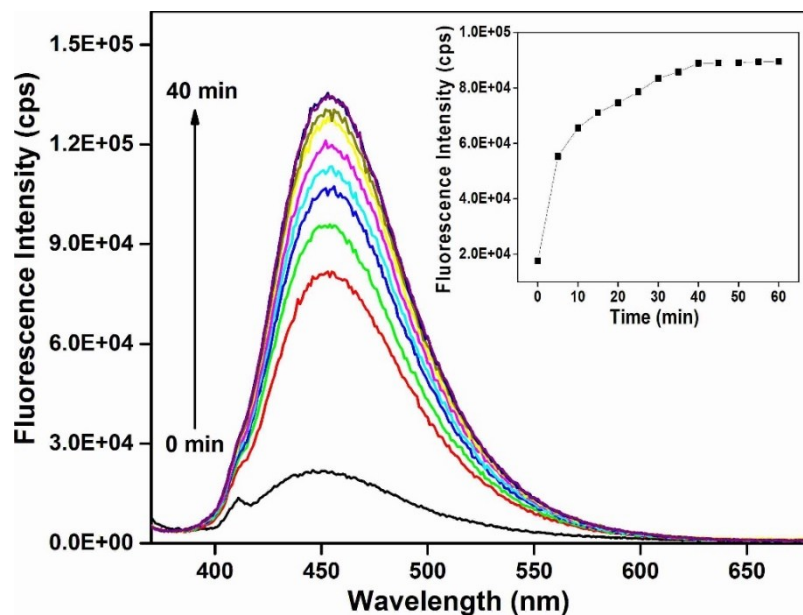

**Figure S24.** Enhancement of the fluorescence intensity of 1' (suspended in 10 mM HEPES buffer at pH = 3.4) with time upon the addition of 400  $\mu$ L of 2 mM  $\text{Na}_3\text{PO}_4$  solution (in 10 mM HEPES buffer pH = 3.4).

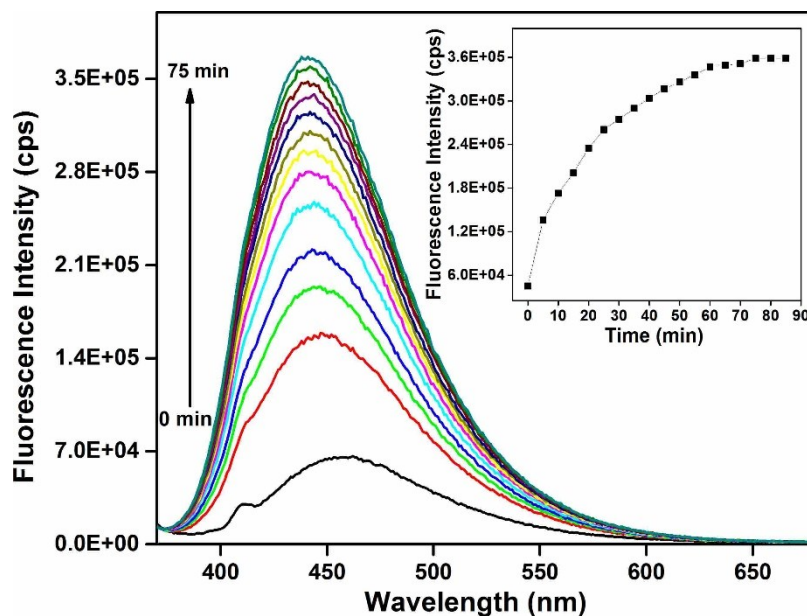

**Figure S25.** Enhancement of the fluorescence intensity of 1' (suspended in 10 mM HEPES buffer at pH = 5.4) with time upon the addition of 400  $\mu$ L of 2 mM  $\text{Na}_3\text{PO}_4$  solution (in 10 mM HEPES buffer pH = 5.4).



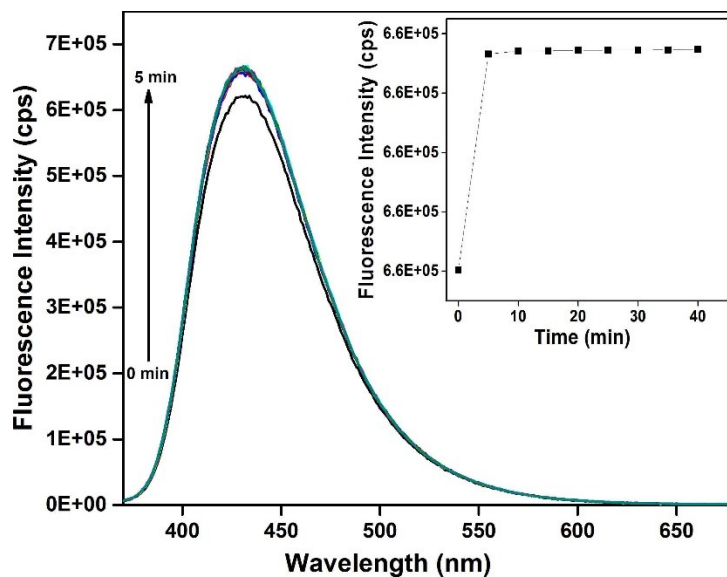

**Figure S26.** Enhancement of the fluorescence intensity of **1'** (suspended in 10 mM HEPES buffer at pH = 9.4) with time upon the addition of 400  $\mu$ L of 2 mM  $\text{Na}_3\text{PO}_4$  solution (in 10 mM HEPES buffer pH = 9.4).

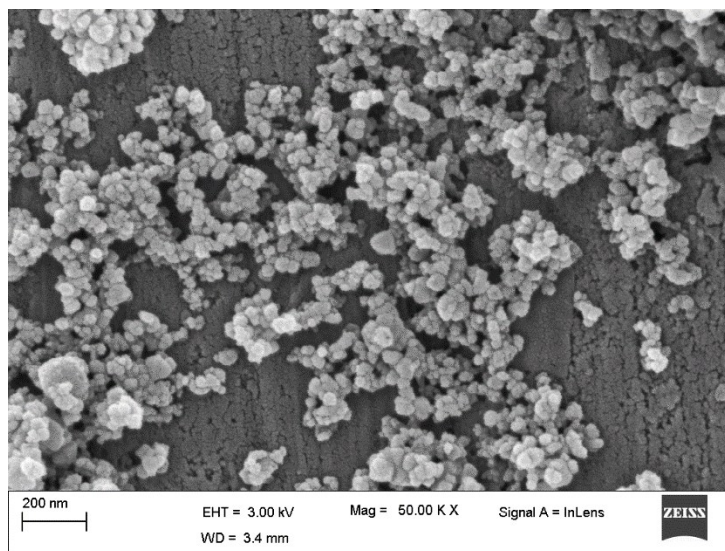

**Figure S27.** FE-SEM images of **1'**.

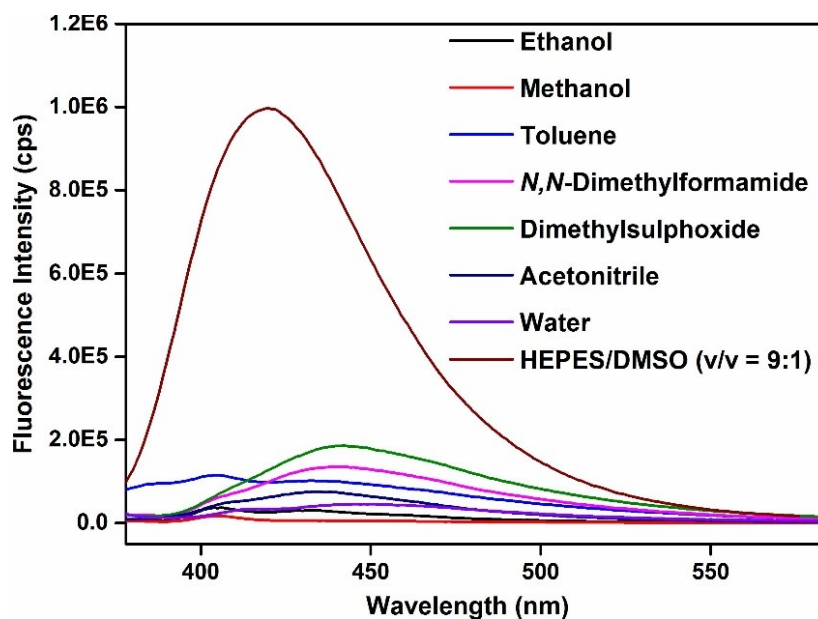

**Figure S28.** Fluorescence emission spectra of **1'** suspended in different solvents.

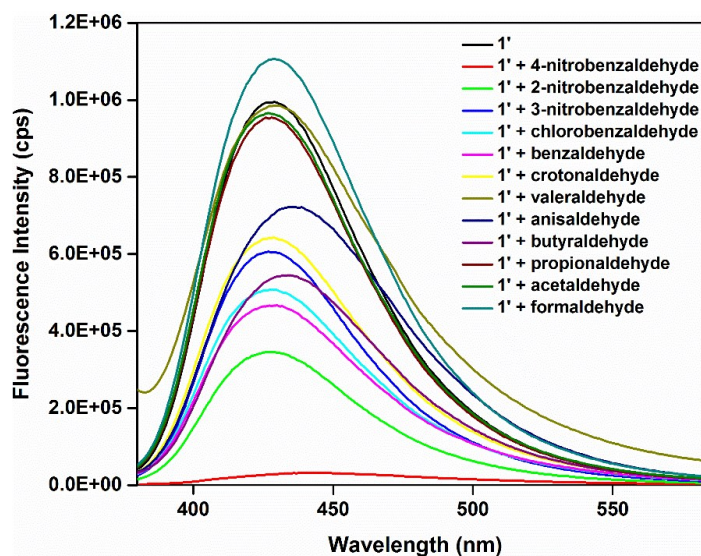

**Figure S29.** Fluorescence emission spectra representing the selectivity of **1'** towards 4-NB over other competing aldehydes in HEPES/DMSO (v/v = 9:1) mixture. 400  $\mu$ L of 50 mM aldehyde solutions were added.



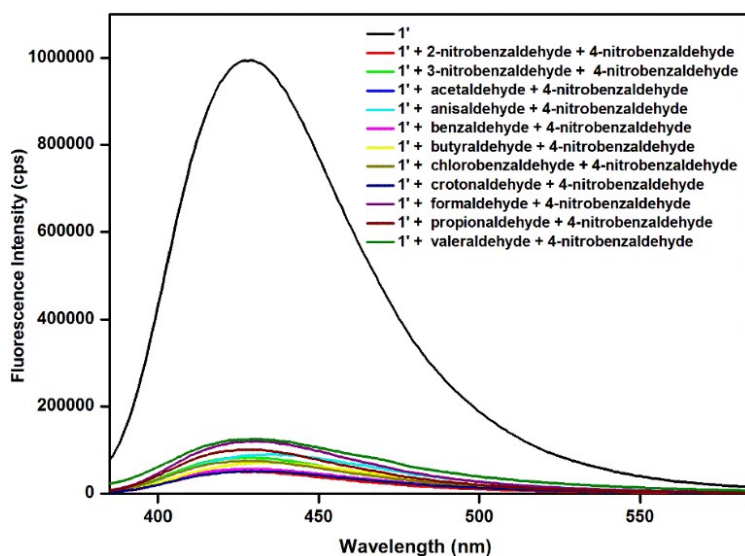

**Figure S30.** Fluorescence emission spectra representing the selectivity of 4-NB towards **1'** in the presence of other competing aldehydes in HEPES/DMSO (v/v = 9:1) mixture. 400  $\mu$ L of 50 mM aldehyde solutions were added.

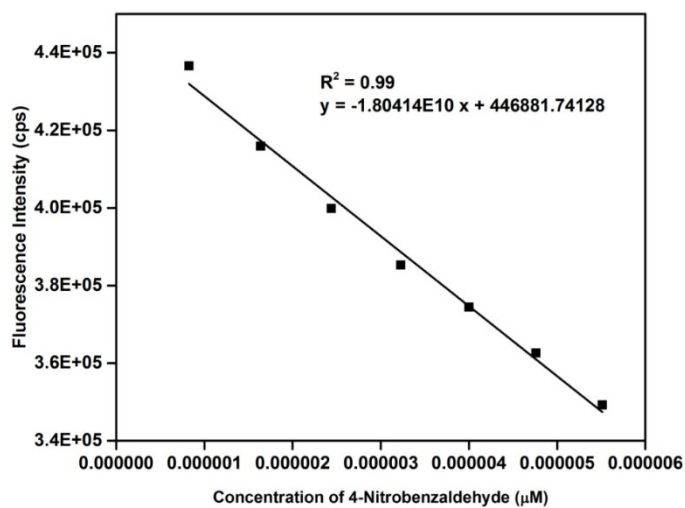

**Figure S31.** Change in fluorescence intensity of **1'** as a function of concentration of 4-NB solution in HEPES/DMSO (v/v = 9:1) mixture. 4-NB was added as a solution in DMSO.

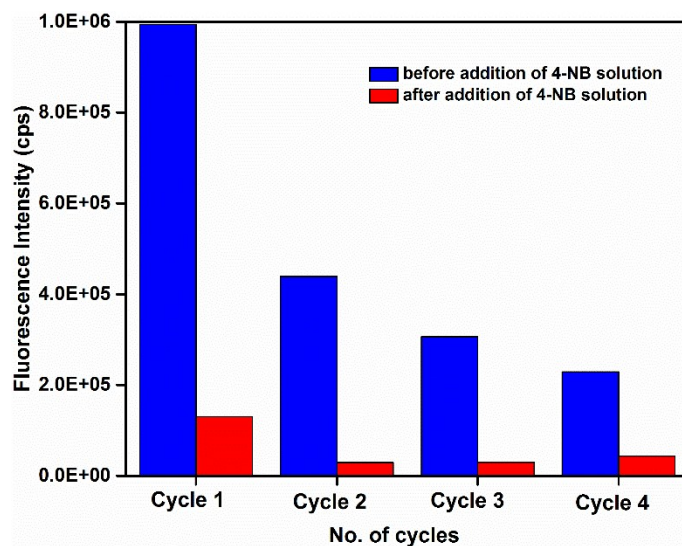

**Figure S32.** Recyclability of the quenching efficiency of **1'** towards 4-NB in HEPES/DMSO (v/v = 9:1) mixture.

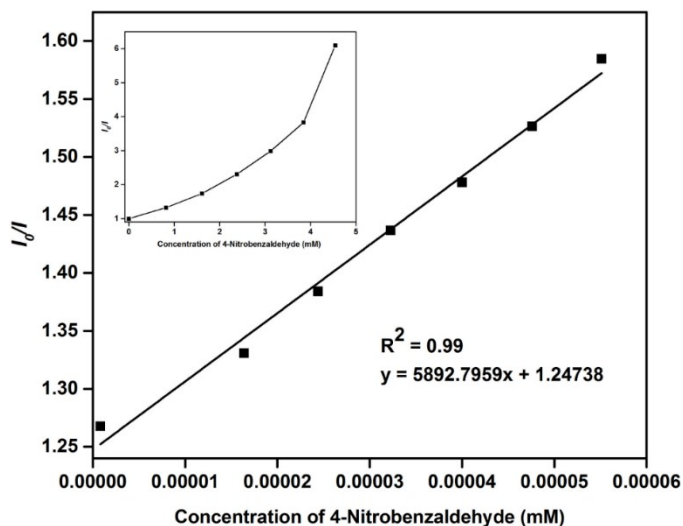

**Figure S33.** Stern-Volmer plot for the fluorescence quenching of **1'** upon the addition of 4-NB solution. Inset: non-linearity of the plot at higher concentrations of 4-NB solution.

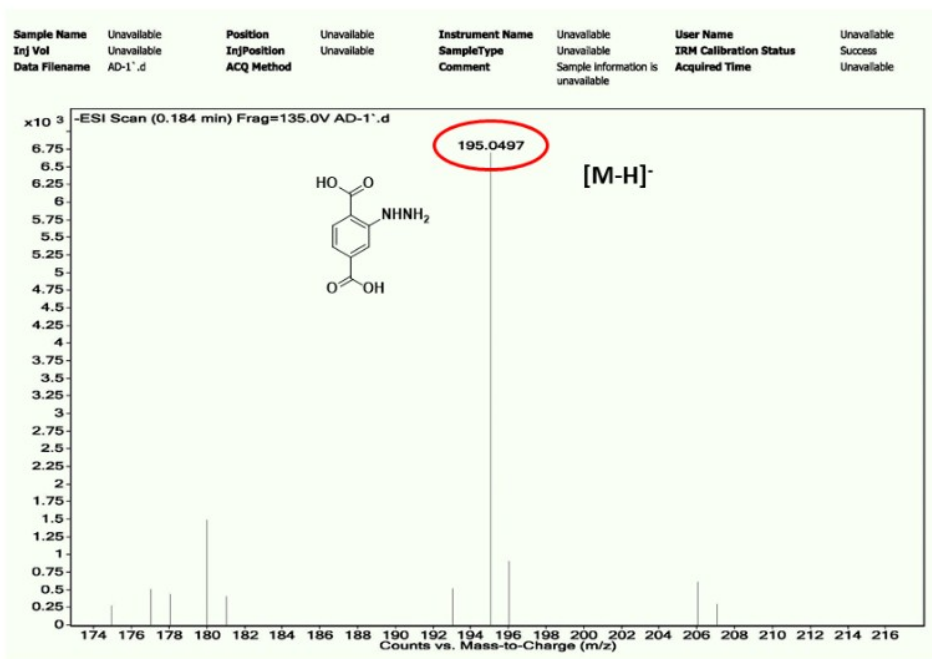

**Figure S34.** ESI-MS spectrum of the un-treated **1'** (digested in MeOH/HF). The spectrum shows m/z (negative ion mode) peak at 195.0497, which corresponds to (M-H)<sup>-</sup> ion (M = mass of H<sub>2</sub>BDC-N<sub>2</sub>H<sub>3</sub> ligand).

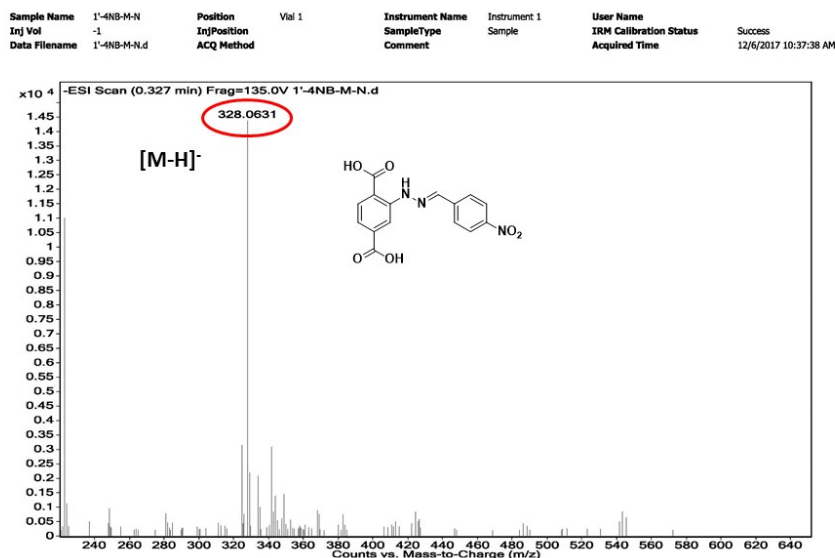

**Figure S35.** ESI-MS spectrum of the 4-NB treated **1'** (digested in MeOH/HF). The spectrum shows m/z (negative ion mode) peak at 328.0631, which corresponds to (M-H)<sup>-</sup> ion of (*E*)-2-(2-(4-nitrobenzylidene)hydrazinyl)terephthalic acid ligand.

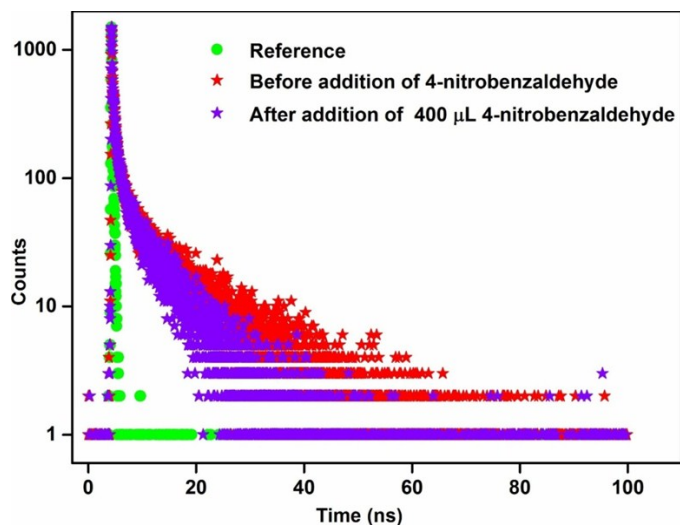

**Figure S36.** Lifetime decay profile of **1'** before and after the addition of 400  $\mu\text{L}$  of 50 mM 4-NB solution.

**Table S1.** Unit cell parameters of as-synthesized Zr-UiO-66- $\text{N}_2\text{H}_3$  obtained by indexing its XRPD pattern. The obtained values were compared with those of the previously reported unfunctionalized Zr-UiO-66 MOF.

| Compound Name                | Zr-UiO-66- $\text{N}_2\text{H}_3$ MOF<br>(This work) | Zr-UiO-66 MOF<br>(Reported) <sup>1</sup> |
|------------------------------|------------------------------------------------------|------------------------------------------|
| Crystal System               | cubic                                                | cubic                                    |
| $a = b = c$ ( $\text{\AA}$ ) | 20.723(4)                                            | 20.7004(2)                               |
| $V$ ( $\text{\AA}^3$ )       | 8898.8(26)                                           | 8870.3(2)                                |

**Table S2.** Average excited-state lifetime ( $\langle\tau\rangle^*$ ) values of **1'** before and after the addition of 400  $\mu\text{L}$  of 50 mM 4-NB solution ( $\lambda_{\text{ex}} = 360 \text{ nm}$ ,  $\lambda_{\text{em}} = 430 \text{ nm}$ ).

| Volume of 4-NB Solution Added ( $\mu\text{L}$ ) | $B_1$  | $B_2$  | $a_1$ | $a_2$ | $\tau_1$ (ns) | $\tau_2$ (ns) | $\langle\tau\rangle^*$ (ns) |
|-------------------------------------------------|--------|--------|-------|-------|---------------|---------------|-----------------------------|
| 0                                               | 0.3575 | 0.0070 | 0.744 | 0.256 | 0.516         | 9.068         | 2.704                       |
| 400                                             | 0.4874 | 0.0101 | 0.787 | 0.213 | 0.427         | 5.557         | 1.519                       |

\*  $\langle\tau\rangle = a_1\tau_1 + a_2\tau_2$

**Table S3.** Similarities and dissimilarities observed during the sensing of  $\text{PO}_4^{3-}$  and 4-NB.

| Sl. No. | Factors Considered            | Similarity         |                  | Dissimilarity                                                                                                            |                                                                            |
|---------|-------------------------------|--------------------|------------------|--------------------------------------------------------------------------------------------------------------------------|----------------------------------------------------------------------------|
|         |                               | $\text{PO}_4^{3-}$ | 4-NB             | $\text{PO}_4^{3-}$                                                                                                       | 4-NB                                                                       |
| 1       | Selectivity                   | Highly selective   | Highly selective | –                                                                                                                        | –                                                                          |
| 2       | Sensing Medium                | –                  | –                | water and HEPES buffer (10 mM, pH = 7.4)                                                                                 | DMSO/HEPES (9:1, v/v)                                                      |
| 3       | Nature of Fluorescence Change | –                  | –                | turn-on                                                                                                                  | turn-off                                                                   |
| 4       | Response Time                 | –                  | –                | 90 min in water and 100 min in HEPES buffer (10 mM, pH = 7.4)                                                            | within 1 min                                                               |
| 5       | Detection Limit               | –                  | –                | 0.196 $\mu\text{M}$                                                                                                      | 4.7 $\mu\text{M}$                                                          |
| 6       | Sensing Mechanism             | –                  | –                | $\text{PO}_4^{3-}$ binds with framework Zr(IV) ions causing partial framework collapse and subsequent release of ligands | – $\text{NHNH}_2$ group of ligand forms imine bond with –CHO group of 4-NB |

**Reference:**

1. J. H. Cavka, S. Jakobsen, U. Olsbye, N. Guillou, C. Lamberti, S. Bordiga and K. P. Lillerud, *J. Am. Chem. Soc.*, 2008, **130**, 13850–13851
